# Supplementary material for: Self-healing for nanolayered manganese oxides in the presence of cerium(iv) ammonium nitrate: new findings
Source: Royal Society of Chemistry journal article supplement (doi:10.1039/c4nj02092h), 2015-01-01
Supplement: c4nj02092h1.pdf [file c4nj02092h1.pdf]

# **Electronic Supplementary Information**

## **(ESI)**

# **Self-healing for nanolayered manganese oxides in the presence of cerium(IV) ammonium nitrate: New findings**

Mohammad Mahdi Najafpour,<sup>\*ab</sup> Maryam Khoshkam,<sup>‡ac</sup> Davood Jafarian Sedigh,<sup>‡a</sup>  
Ali Zahraei<sup>a</sup> and Mohsen Kompany-Zareh<sup>a</sup>

<sup>a</sup>*Department of Chemistry, Institute for Advanced Studies in Basic Sciences (IASBS), Zanjan, 45137-66731, Iran*

<sup>b</sup>*Center of Climate Change and Global Warming, Institute for Advanced Studies in Basic Sciences (IASBS), Zanjan, 45137-66731, Iran*

<sup>c</sup>*School of Pharmacy, Zanjan University of Medical Sciences, P.O. Box 45195-1338, Postal Code 45139-56184, Zanjan, Iran*

<sup>d</sup>*Young Researchers and Elite Club, Qom Branch, Islamic Azad University, Qom, Iran*

<sup>\*</sup>*Corresponding authors; Phone: (+98) 24 3315 3201; E-mail: [mmnajafpour@iasbs.ac.ir](mailto:mmnajafpour@iasbs.ac.ir) (MMN)*

<sup>‡</sup>*These authors contributed equally to the work.*

### **Synthesis of Mn-K oxide**

Solution 1:  $\text{Mn}(\text{CH}_3\text{COO})_2 \cdot 2\text{H}_2\text{O}$  (2.77 mmol, 692.0 mg) was dissolved in the smallest possible amount of water.

Solution 2: to a solution of  $\text{KMnO}_4$  (2.00 mmol, 316.0 mg) in 35 mL water contains KOH.

Addition of solution 1 to solution 2 under vigorous stirring resulted in a dark brown precipitate. The obtained suspension was filtered and washed using distilled water (1.0 L) before being allowed to dry for 12 h at 60 °C in an oven. The compound was heated to higher temperature (100-750 °C) for 10 h in air to obtain a brown powder.

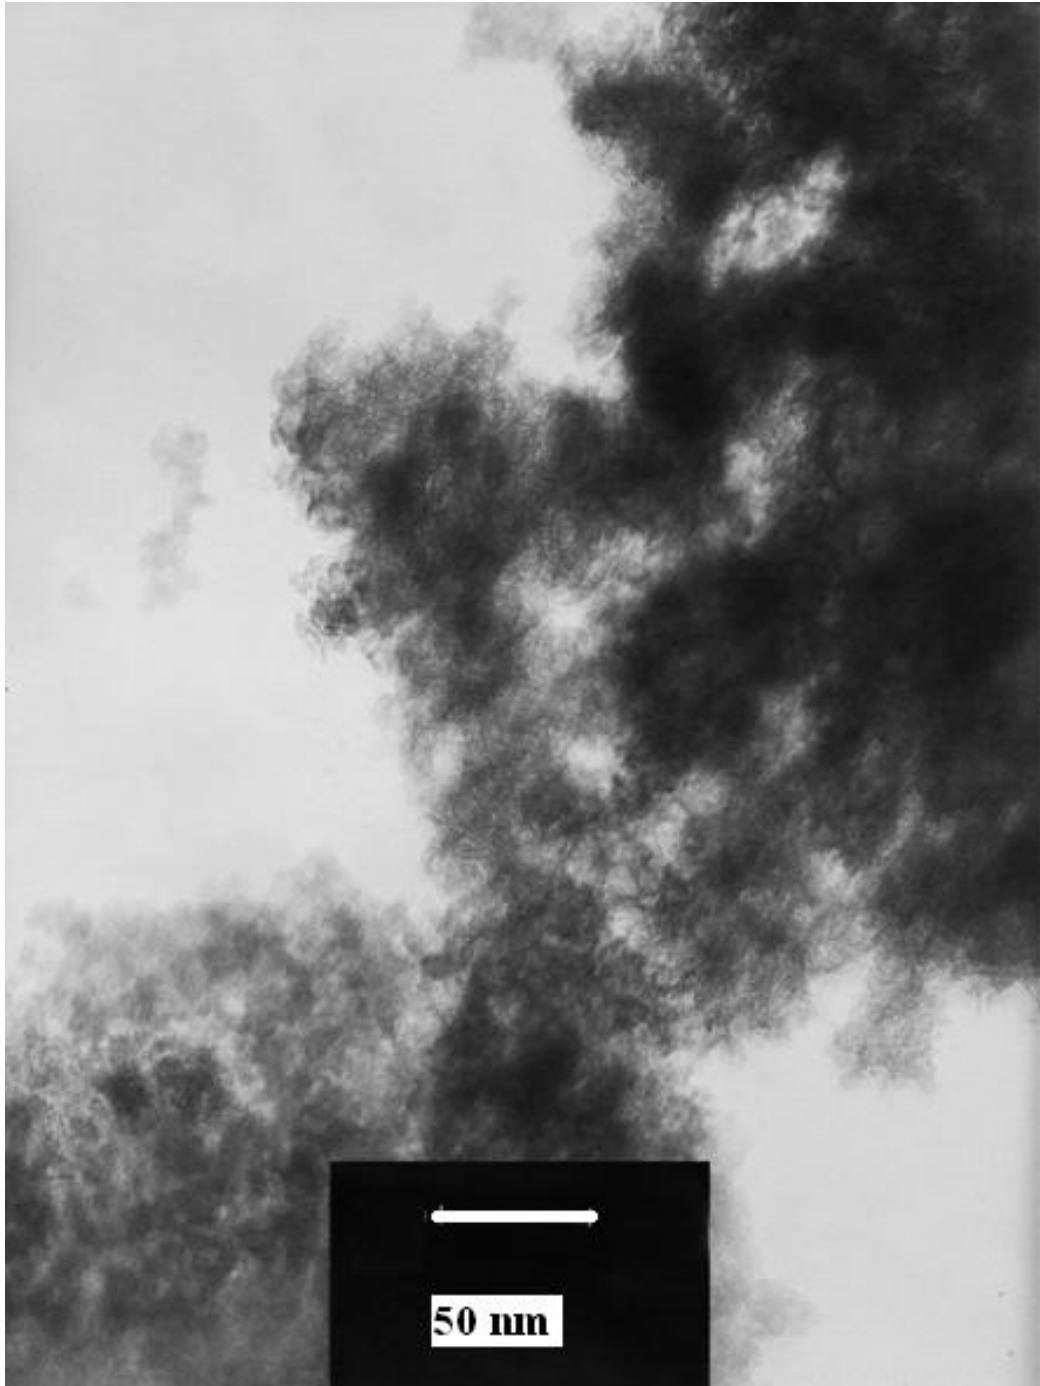

a

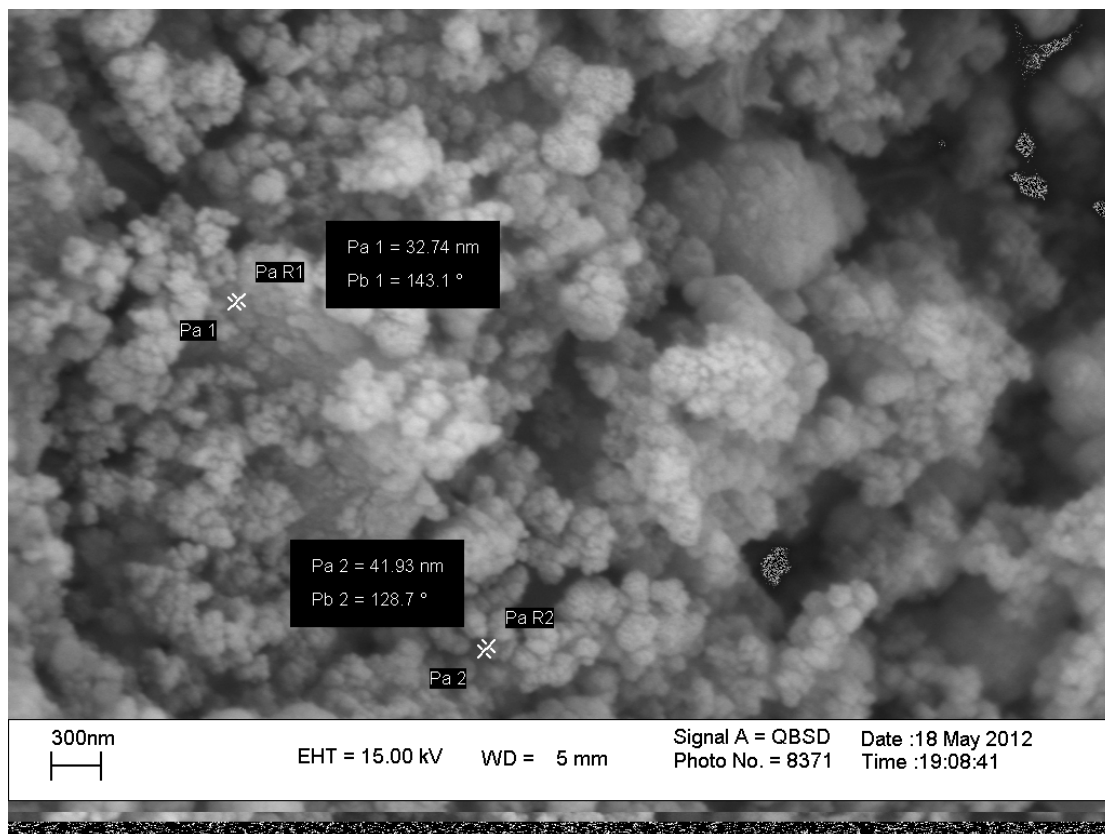

b

Fig. 1 TEM (a) and SEM (b) images from nanolayered Mn oxide. Reprinted with permission from ref. 1. Copyright (2013) by Royal Society of Chemistry.

Table S1 Experimental conditions of ten data matrices.

| Data matrix | [Ce <sup>4+</sup> ] |
|-------------|---------------------|
| D1          | 0.05                |
| D2          | 0.1                 |
| D3          | 0.12                |
| D4          | 0.15                |
| D5          | 0.2                 |
| D6          | 0.5                 |
| D7          | 0.75                |
| D8          | 1                   |
| D9          | 1.5                 |
| D10         | 2.0                 |

## Reference

1.M. M. Najafpour, M. Kompany-Zareh, A. Zahraei, D. Jafarian Sedigh, H. Jaccard, M. Khoshkam, R. D. Britt and W. Casey, *Dalton Trans.*, 2013, **42**, 14603.
